# Supplementary material for: Cabozantinib versus sunitinib as initial therapy for metastatic renal cell carcinoma of intermediate or poor risk (Alliance A031203 CABOSUN randomised trial): Progression-free survival by independent review and overall survival update
Source: PubMed Central journal article supplement — Eur J Cancer. Author manuscript; Available in PMC 2018 Jul 24. (PMC6057479; doi:10.1016/j.ejca.2018.02.012), 2018-03-20
Supplement: NIHMS977872-supplement.pdf [file NIHMS977872-supplement.pdf]

## **Supplementary Appendix**

Supplement to: Choueiri TK, Hessel C, Halabi S, et al. Cabozantinib versus sunitinib as initial therapy for metastatic renal cell carcinoma of intermediate or poor risk (Alliance A031203 CABOSUN trial): progression-free survival by independent review and overall survival update.

## List of participating sites

### Institute, Investigator [Number of patients]

Dana-Farber Cancer Institute, Toni Choueiri [16]  
Washington University School of Medicine, Joel Picus [12]  
The Ohio State University, J. Paul Monk III [10]  
West Michigan Cancer Center, Kathleen Yost; Sunil Nagpal (former PI) [5]  
University of Iowa/Holden Comprehensive Cancer Center, Laith Abushahin; Daniel Vaena (former PI) [4]  
Duke University Medical Center, Jeffrey Crawford [4]  
Medical University of South Carolina, Harry Drabkin [4]  
Wake Forest Baptist Health, Christopher Thomas [4]  
Mayo Clinic - Rochester, Brian Costello [3]  
Cancer Center of Kansas - Wichita (Main), Shaker Dakhil [3]  
Oklahoma Cancer Specialists and Research Institute-Tulsa, Mark Roger Olsen [3]  
Virginia Commonwealth University/Massey Cancer Center, Asit Paul; Craig Swainey (former PI) [3]  
University of Chicago Comprehensive Cancer Center, Walter Stadler [3]  
University of Kentucky/ Markey Cancer Center, Peng Wang; Dennie Vance Jones (former PI) [3]  
Park Nicollet- Saint Louis Park (Metro MN), Daniel Anderson [2]  
Southeastern Medical Oncology Center, James Atkins [2]  
McLeod Regional Medical Center, Rajesh Bajaj [2]  
Mercy Hospital Springfield, Jay Carlson [2]  
Massachusetts General Hospital Cancer Center, Toni Choueiri [2]  
Montefiore Medical Center, Benjamin Gartrell [2]  
Hackensack University Medical Center, Samuel Goldlust [2]  
Southern Cancer Center, Brian Heller [2]  
Hematology- Oncology Associates of Central New York, Jeffrey Kirshner [2]  
Memorial University Medical Center, Harvey Lebos [2]  
McFarland Clinic, Joseph Merchant [2]  
Columbus Oncology and Hematology Associates Inc, Timothy Moore; John P Kuebler (former PI) [2]  
Flower Hospital, Jeffrey Muler [2]  
MedStar Georgetown University Hospital, George Philips [2]  
Saint Joseph Mercy Hospital, Christopher Reynolds [2]  
VA Western NY Healthcare System, Lynn Steinbrenner [2]  
Siouxland Regional Cancer Center, Donald Wender [2]  
Regions Hospital (Metro MN), Daniel Anderson [1]  
Fairview- Southdale Hospital (Metro MN), Daniel Anderson [1]  
Saint Francis Regional Medical Center (Metro MN), Daniel Anderson [1]  
Minnesota Oncology and Hematology PA-Woodbury, Daniel Anderson [1]  
Lakeview Hospital, Daniel Anderson [1]  
University of Oklahoma Health Sciences Center, Adam Asch; Carla Kurkjian (former PI) [1]  
Queen's Medical Center, Jeffrey Berenberg [1]

Straub Clinic and Hospital, Jeffrey Berenberg [1]  
Froedtert and Medical College of Wisconsin, Kathryn Bylow [1]  
Mercy Hospital Oklahoma City, Vikki Canfield [1]  
Providence Portland Medical Center, Alison K Conlin [1]  
Cancer Center of Kansas - Dodge City (Wichita), Shaker Dakhil [1]  
Nevada Cancer Research Foundation, John Ellerton [1]  
Missouri Baptist Medical Center, Bryan Faller; Alan Lyss (former PI) [1]  
Memorial Sloan Kettering Cancer Center, Darren Feldman; Michael Morris (former PI) [1]  
Roswell Park Cancer Institute, Saby George [1]  
Glens Falls Hospital, Aqeel Gillani [1]  
Kettering Medical Center, Howard Gross [1]  
Blanchard Valley Hospital, Howard Gross [1]  
Green Bay Oncology - Escanaba, Anthony J Jaslowski [1]  
Green Bay Oncology Limited at Saint Mary's Hospital, Anthony J Jaslowski [1]  
Guthrie Medical Group PC/Robert Packer Hospital, Bradley Lash; Edward T O'Brien (former PI); Philip Lowry (former PI) [1]  
University of New Mexico (UNM) Comprehensive Cancer Center, Richard Lauer [1]  
Columbia University Medical Center, Emerson Lim; Bret Taback (former PI) [1]  
Illinois Cancer Center, Jane Liu; Nguyet Le-Lindqwister (former PI) [1]  
Minneapolis Veterans Medical Center, Sharon Luikart [1]  
Saint Vincent Healthcare, Benjamin Marchello [1]  
Bozeman Deaconess Hospital, Benjamin Marchello [1]  
Benefis Healthcare-Sletten Cancer Institute, Benjamin Marchello [1]  
Ochsner Medical Center, Marc Matrana [1]  
Riverside Methodist Hospital, Timothy Moore; John P Kuebler (former PI) [1]  
The Mark H Zangmeister Center, Timothy Moore; John P Kuebler (former PI) [1]  
Mount Carmel Medical Health Center West, Timothy Moore; John P Kuebler (former PI) [1]  
Grant Medical Center, Timothy Moore; John P Kuebler (former PI) [1]  
Fort Wayne Medical Oncology and Hematology, Sreenivasa Nattam [1]  
Geisinger Medical Center Cancer Center Haselton, Rajiv Panikkar [1]  
MedStar Washington Hospital Center, George Philips [1]  
UC San Diego Moores Cancer Center, James Michael Randall [1]  
Altru Cancer Center, Grant Seeger [1]  
Sanford Roger Maris Cancer Center, Preston Steen; Mirosław Mazurczak (former PI) [1]  
Sanford Roger Maris Cancer Center, Preston Steen [1]  
Boulder Community Hospital, Keren Sturtz [1]  
Weill Cornell Medicine, Scott Tagawa [1]  
Decatur Memorial Hospital, James Wade III [1]  
Kinston Medical Specialist PA, Peter R Watson [1]  
Carle Cancer Center, Yujie Zhao [1]

**Figure S1. Forest plot of progression-free survival per independent radiology review committee**

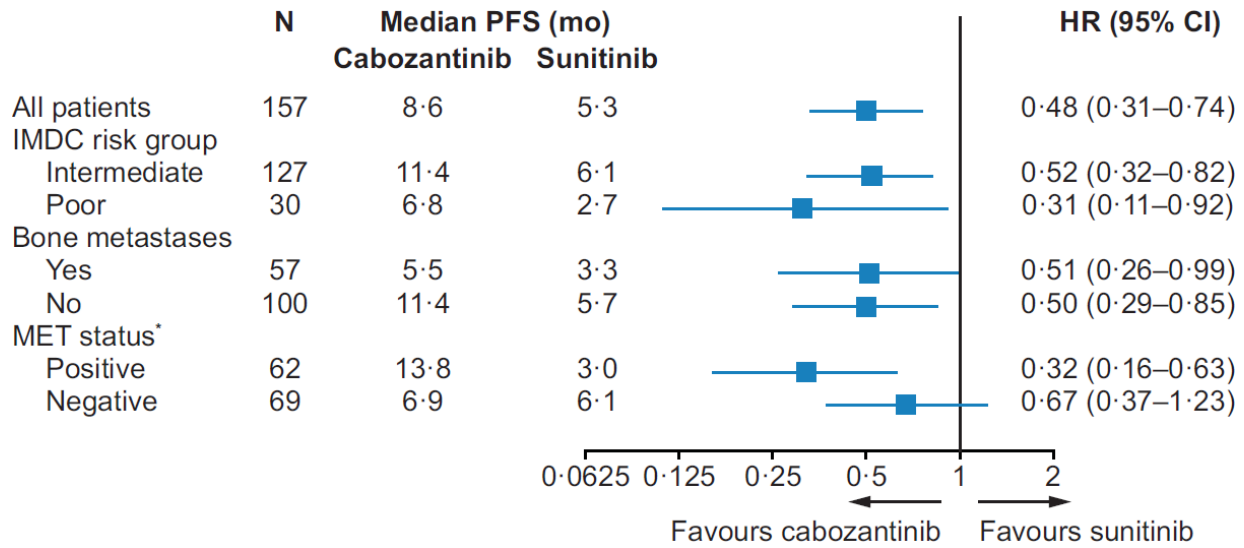

HR, hazard ratio; IMDC, International Metastatic Renal Cell Carcinoma Database Consortium; PFS, progression-free survival. Data are as of September 15, 2016. All randomised patients were included in the analyses. Hazard ratios are unstratified with the exception of the analysis for all patients.

\*Eight patients in the cabozantinib group and 18 patients in the sunitinib group had unknown MET status.

**Table S1. Tumour response per investigator**

|                                  | <b>Cabozantinib<br/>(N=79)</b> | <b>Sunitinib<br/>(N=78)</b> |
|----------------------------------|--------------------------------|-----------------------------|
| Objective response rate (95% CI) | 33% (23% – 44%)                | 12% (5% – 21%)              |
| Best overall response            |                                |                             |
| Confirmed complete response      | 1 (1%)                         | 0                           |
| Confirmed partial response       | 25 (32%)                       | 9 (12%)                     |
| Stable disease                   | 34 (43%)                       | 29 (37%)                    |
| Progressive disease              | 14 (18%)                       | 19 (24%)                    |
| Unevaluable or missing*          | 5 (6%)                         | 21 (27%)                    |

Data are % or n (%) and are as of September 15, 2016.

\*Unevaluable or missing for the following reasons: cabozantinib: adverse event (4), withdrew consent (1); sunitinib: adverse event (7), death (2), disease progression (2), withdrew consent (9), other (referred to hospice treatment; 1)

**Table S2. Study disposition and baseline characteristics by best overall response per independent radiology committee**

|                                                      | Sunitinib                                 |                                             | Cabozantinib                              |                                            |
|------------------------------------------------------|-------------------------------------------|---------------------------------------------|-------------------------------------------|--------------------------------------------|
|                                                      | Response Assessment was PR/SD/PD (N = 60) | Response Assessment was Missing/UE (N = 18) | Response Assessment was PR/SD/PD (N = 73) | Response Assessment was Missing/UE (N = 6) |
| Discontinued study treatment                         | 60 (100%)                                 | 18 (100%)                                   | 73 (100%)                                 | 6 (100%)                                   |
| Disease progression                                  | 40 (67%)                                  | 1 (6%)                                      | 44 (60%)                                  | 0                                          |
| Adverse events                                       | 10 (17%)                                  | 6 (33%)                                     | 11 (15%)                                  | 5 (83%)                                    |
| Alternative therapy                                  | 1 (2%)                                    | 0                                           | 1 (1%)                                    | 0                                          |
| Patient off-treatment for other complicating disease | 1 (2%)                                    | 0                                           | 1 (1%)                                    | 0                                          |
| Death                                                | 1 (2%)                                    | 2 (11%)                                     | 2 (3%)                                    | 0                                          |
| Withdrawn consent                                    | 4 (7%)                                    | 9 (50%)                                     | 3 (4%)                                    | 1 (17%)                                    |
| Other                                                | 1 (2%)                                    | 0                                           | 1 (1%)                                    | 0                                          |
| Age (years)                                          | 63 (45-84)                                | 66 (31-87)                                  | 62 (40-82)                                | 68 (53-79)                                 |
| Male                                                 | 45 (75%)                                  | 12 (67%)                                    | 61 (84%)                                  | 5 (83%)                                    |
| Female                                               | 15 (25%)                                  | 6 (33%)                                     | 12 (16%)                                  | 1 (17%)                                    |
| Ethnic origin                                        |                                           |                                             |                                           |                                            |
| White                                                | 57 (95%)                                  | 18 (100%)                                   | 66 (90%)                                  | 4 (67%)                                    |
| Black or African American                            | 2 (3%)                                    | 0                                           | 3 (4%)                                    | 0                                          |
| Other                                                | 1 (2%)                                    | 0                                           | 54 (7%)                                   | 2 (33%)                                    |
| ECOG PS                                              |                                           |                                             |                                           |                                            |
| 0                                                    | 28 (47%)                                  | 8 (44%)                                     | 35 (48%)                                  | 1 (17%)                                    |
| 1                                                    | 26 (43%)                                  | 6 (33%)                                     | 31 (42%)                                  | 2 (33%)                                    |
| 2                                                    | 6 (10%)                                   | 4 (22%)                                     | 7 (10%)                                   | 3 (50%)                                    |
| IMDC risk group                                      |                                           |                                             |                                           |                                            |
| Intermediate                                         | 50 (83%)                                  | 13 (72%)                                    | 61 (84%)                                  | 3 (50%)                                    |
| Poor                                                 | 10 (17%)                                  | 5 (28%)                                     | 12 (16%)                                  | 3 (50%)                                    |
| Bone metastases per IxRS                             |                                           |                                             |                                           |                                            |
| Yes                                                  | 21 (35%)                                  | 7 (39%)                                     | 25 (34%)                                  | 4 (67%)                                    |
| No                                                   | 39 (65%)                                  | 11 (61%)                                    | 48 (66%)                                  | 2 (33%)                                    |
| Nephrectomy                                          | 47 (78%)                                  | 13 (72%)                                    | 54 (74%)                                  | 3 (50%)                                    |

|                                             | Sunitinib                                 |                                             | Cabozantinib                              |                                            |
|---------------------------------------------|-------------------------------------------|---------------------------------------------|-------------------------------------------|--------------------------------------------|
|                                             | Response Assessment was PR/SD/PD (N = 60) | Response Assessment was Missing/UE (N = 18) | Response Assessment was PR/SD/PD (N = 73) | Response Assessment was Missing/UE (N = 6) |
| Number of metastatic sites per investigator |                                           |                                             |                                           |                                            |
| 0                                           | 0                                         | 0                                           | 0                                         | 0                                          |
| 1                                           | 20 (33%)                                  | 6 (33%)                                     | 15 (21%)                                  | 2 (33%)                                    |
| 2                                           | 16 (27%)                                  | 4 (22%)                                     | 34 (47%)                                  | 3 (50%)                                    |
| ≥3                                          | 24 (40%)                                  | 8 (44%)                                     | 24 (33%)                                  | 1 (17%)                                    |

Data are n (%) or median (range). CR, complete response; ECOG PS, Eastern Cooperative Oncology Group performance status; IMDC, International metastatic renal cell carcinoma Database Consortium; IRC, independent radiology review committee; IxRS, interactive voice/web response system; PD, progressive disease; PR, partial response; SD, stable disease; UE, unable to evaluate.

**Table S3. Subsequent anticancer therapy**

|                                   | <b>Cabozantinib<br/>(N=79)</b> | <b>Sunitinib<br/>(N=78)</b> |
|-----------------------------------|--------------------------------|-----------------------------|
| Any subsequent anticancer therapy | 51 (65%)                       | 50 (64%)                    |
| Radiotherapy                      | 10 (13%)                       | 14 (18%)                    |
| Surgery                           | 5 (6%)                         | 6 (8%)                      |
| Systemic therapy                  | 48 (61%)                       | 48 (62%)                    |
| Tyrosine kinase inhibitors        | 38 (48%)                       | 37 (47%)                    |
| Axitinib                          | 18 (23%)                       | 16 (21%)                    |
| Pazopanib                         | 14 (16%)                       | 10 (13%)                    |
| Sunitinib                         | 11 (14%)                       | 10 (13%)                    |
| Sorafenib                         | 1 (1%)                         | 2 (3%)                      |
| Cabozantinib                      | 1 (1%)                         | 6 (8%)                      |
| Lenvatinib                        | 1 (1%)                         | 0                           |
| mTOR inhibitors                   | 15 (19%)                       | 18 (23%)                    |
| Everolimus                        | 8 (10%)                        | 15 (19%)                    |
| Temsirolimus                      | 7 (9%)                         | 4 (5%)                      |
| PD-1 checkpoint inhibitors        | 14 (18%)                       | 15 (19%)                    |
| Cytokines                         | 3 (4%)                         | 1 (1%)                      |

PD-1, programmed cell death-1.
